# Supplementary material
Source: Elsevier journal article supplement (https://www.sciencedirect.com/science/article/pii/S2666506920300407)
Supplement: mmc2 [file S2666506920300407:mmc2.docx]

# Resumen

Introducción:

La Ratio isquiosurales/cuádriceps (I/Q) y la fatiga neuromuscular han sido descritos como dos de los principales factores de riesgo modificables de sufrir una lesión del ligamento cruzado anterior.

El objetivo principal de esta investigación fue estudiar el efecto de la fatiga neuromuscular en la Ratio I/Q y en la fuerza máxima isométrica de cuádriceps y de isquiosurales en jugadoras adolescentes de baloncesto y balonmano.

Material y métodos:

Estudio experimental prospectivo pre-post intervención con una muestra de 19 jugadoras de baloncesto y 11 jugadoras de balonmano (17.02 ± 1.19 años, 177.8 ± 7.2 cm y 68.6 ± 9.3 kg). Para registrar la fuerza muscular se utilizó un test de fuerza máxima isométrica en una posición de 90º de cadera y 60º de rodilla. Posteriormente se calculó la Ratio I/Q. El test de fatiga intermitente 30-15 (30-15IFT) se aplicó para inducir la fatiga, cuantificada mediante la escala de percepción externa de fatiga (RPE). Se realizó un análisis descriptivo y una prueba T-test para estudiar las diferencias en la Ratio I/Q, la fuerza muscular y la fatiga pre-post intervención.

Resultados:

Aunque la Ratio I/Q disminuyó después del 30-15IFT, las diferencias no fueron estadísticamente significativas. En cuanto a los valores de fuerza, el cuádriceps derecho presentó una pérdida de fuerza del 4.52% y el cuádriceps izquierdo del 5.55%. La disminución de la fuerza fue estadísticamente significativa (p ≤ 0.05), sobre todo en el isquiosural derecho (-7.3%) y en el isquiosural izquierdo (-7.5%).

Se concluye que, en presencia de fatiga, la fuerza muscular de la extremidad inferior disminuye y hay una tendencia a que la Ratio I/Q también disminuya.

Palabras clave: “Deporte femenino”, “Ratio I/Q”, “Fuerza muscular” y “Fatiga muscular”.

# Abstract

Introduction:

Some of the main modifiable risk factors when suffering an injury in the anterior cruciate ligament are known to be the hamstring to quadriceps (H/Q) Ratio and neuromuscular fatigue.

The aim of this research was to study the effect of neuromuscular fatigue on the H/Q Ratio and the maximum isometric strength of the quadriceps and hamstrings in adolescent basketball and handball players.

Material and methods:

This is an experimental, pre-post intervention study with a sample of 19 basketball players and 11 handball players (17.02 ± 1.19 yo, 177.8 ± 7.2 cm and 68.6 ± 9.3 kg). To assess muscle strength, an isometric maximum strength test (manual dynamometer, MARK 10 Corporation, NY) was performed in a 90º hip and 60º knee position. Subsequently, the H/Q Ratio was calculated. The Intermittent Fatigue Test 30-15 (30-15IFT) was applied to induce fatigue, which was measured using the external fatigue perception scale (RPE). A descriptive analysis and a T-test were performed to study the differences in the H/Q Ratio, muscle strength and the fatigue pre-post intervention.

Results:

Although the H/Q Ratio decreased after 30-15 IFT, the differences were not statistically significant. Regarding strength values, the right quadriceps presented a reduction of strength of 4.52% and the left quadriceps of 5.55%. The decreased of strength in both limbs were statistically significant (p ≤ 0.05), specifically 7.3% for the right hamstring and 7.5% for the left hamstring.

The conclusions of the study denote that after a fatigue test, the quadriceps and hamstring muscular strength decreases and it seems that the H/Q Ratio has a similar decreasing tendency.

Key words: “Female Sports”, “H/Q Ratio”, “Muscle strength” and “Muscle fatigue”.

# Introducción

El baloncesto y el balonmano son dos de los deportes de equipo más practicados en Europa.1 Ambos, pero sobre todo el balonmano tienen una alta incidencia lesiva, los estudios registran de 7 a 10 lesiones/1000h de exposición deportiva en el baloncesto femenino 2–5 y 40.7 lesiones/1000h de exposición deportiva en el balonmano femenino.1,6 La mayoría de las lesiones se dan en la extremidad inferior, el 58%-74% en baloncesto y el 54%-59% en balonmano.3,6 Las jugadoras tienen de 2-10 veces más riesgo a sufrir ciertas lesiones como la del ligamento cruzado anterior (LCA) 7, los esguinces de tobillo 2–4 o el dolor femoro-patelar.3,4 Las lesiones del LCA tienen una incidencia de 0.28/1000h de práctica deportiva en el baloncesto femenino 5 y de 0.97/1000h de partidos en el balonmano femenino.8

Aunque el riesgo de sufrir una lesión del LCA es multifactorial, las anomalías en los patrones de movimiento, como el valgo dinámico de la rodilla, durante las actividades de alto impacto como los cambios de dirección, los aterrizajes o las desaceleraciones, son modificables.9 Estos cambios en los patrones de movimiento correctos, frecuentemente se asocian a déficits del control neuromuscular.10 Algunos de los déficits neuromusculares que pueden contribuir a un pobre control biomecánico y, consecuentemente, derivar en lesiones del LCA son los siguientes: a) dominancia de Cuádriceps 9 o Isquiosurales débiles 7,11,12, b) Ratio Isquiosurales/Cuádriceps (Ratio I/Q) muy descompensadas 13, c) déficits de fuerza muscular en la extremidad inferior 7, d) la fatiga neuromuscular 14,15 y e) las asimetrías neuromusculares entre las extremidades.16

Respecto a la Ratio I/Q, los estudios la calculan mediante test de fuerza isocinéticos y establecen que, en deportistas, los valores de normalidad se encuentran entre 0.5 y 0.8 según la velocidad angular de ejecución del test.17–20 Sin embargo, la avaluación de la fuerza utilizando un dinamómetro isocinético a menudo es inaccesible debido a su elevado coste. Esto ha hecho que muchos autores utilicen el dinamómetro manual como una solución válida y fiable con moderada-alta correlación con los test isocinéticos de fuerza de cuádriceps y de isquiosurales.13,19,20 Aunque algún estudio habla de ratios de 0,48 en sedestación con la rodilla a 120º 19, Peek et al. en 2018 concluyen que faltan estudios que establezcan valores de normalidad de Ratio I/Q medidos en isometria.20

Respecto a la fuerza, durante la pubertad, en chicos la de cuádriceps aumenta un 148% y la de isquiosurales un 179%, por otro lado, en chicas aumentan un 44% y un 27% respectivamente. De esta manera en chicas los valores de Ratio I/Q bajan y aumenta el riesgo de sufrir una lesión del LCA.21

Con referencia a la fatiga, los estudios epidemiológicos recogen una elevada incidencia durante los últimos minutos de cada parte de los partidos 22, echo que atribuyen a este factor.15 Aunque faltan estudios, algunos autores demuestran que en presencia de fatiga las jugadoras presentan valores de fuerza muscular más bajos 23,24 y asimismo, disminuciones de la Ratio I/Q.15,24 Pinto et al. en 2017 hizo un test fatigante y observó como los valores de fuerza y Ratio I/Q disminuían, concluyó que los isquiosurales se fatigan antes que los cuádriceps y por lo tanto, hay riesgo de sufrir una lesión del LCA.24

Como se ha podido observar, la Ratio I/Q, la fuerza muscular y la fatiga neuromuscular son tres factores de riesgo de lesión muy importantes.12 El estudio de estos, podría ayudar a disminuir la exposición a sufrir ciertas lesiones como la del LCA. Actualmente, falta evidencia científica sobre la Ratio I/Q en jugadoras de baloncesto y balonmano adolescentes, ya que no existen valores normalizados en esta población donde los valores de fuerza se obtengan en isometría utilizando un dinamómetro manual. Asimismo, faltan estudios que observen cómo se comporta la Ratio I/Q en condiciones de fatiga.

El objetivo principal de esta investigación es estudiar el efecto de la fatiga neuromuscular en la Ratio I/Q en jugadoras de baloncesto y balonmano adolescentes. Como a objetivo secundario, se quiere investigar cómo afecta la fatiga neuromuscular en la fuerza máxima isométrica de cuádriceps e isquiosurales.

# Material y Métodos

## Diseño del estudio

Para poder dar respuesta a los objetivos del estudio, se utilizó un diseño experimental prospectivo pre-post intervención. Se comparó la Ratio I/Q y la fuerza muscular isométrica máxima previa y posterior a un test de fatiga intermitente en un grupo de jugadoras de baloncesto y de balonmano adolescentes da alto rendimiento. El test de fuerza realizado a las jugadoras sirvió para obtener los valores de fuerza máxima isométrica en Newtons (N) y calcularse la Ratio I/Q, este test se repitió antes y después del test de fatiga intermitente 30-15 (30-15 IFT) para poder comparar los valores obtenidos.

Muestra del estudio

Los criterios de inclusión de este estudio fueron; ser jugadora de baloncesto o de balonmano de alto rendimiento de entre 14 y 18 años. Las jugadoras debían practicar entre 15-20h de ejercicio físico semanales, sumando entrenamientos y partidos.

Fueron excluidas del estudio las jugadoras que, en el momento del test, presentaran alguna lesión (aguda o crónica) y las que hubiesen jugado un partido los dos días previos al estudio.

Con los criterios expuestos, el tamaño de la muestra fue de 30 sujetos. El tamaño se calculó aceptando un riesgo alfa de 0.05 y un riesgo beta inferior al 0.2, un contraste bilateral y se quiso detectar una diferencia igual o superior a 0.3 unidades. Se asumió una desviación estándar de 0.55 y una tasa de pérdidas de seguimiento del 10%. Se seleccionaron 19 jugadoras de baloncesto del equipo “Segle XXI” y 11 jugadoras de balonmano del centro de tecnificación Residencia Joaquim Blume.

## Valoraciones y test

Las jugadoras asistieron dos sesiones en un periodo de 14 días, la primera para familiarizarse con los test y la segunda para hacer la presa de dadas. El día de la presa de datos, vinieron en grupos de 5, empezaron con un calentamiento (*Anexo 1*) seguido de un test de fuerza máxima isométrica y dando un valor de la escalera de percepción externa de fatiga (RPE). Una vez finalizadas las pruebas hicieron el 30-15 IFT y se repitieron las valoraciones iniciales.

Test de fuerza máxima isométrica:

La fuerza máxima de los cuádriceps y de los isquiosurales se midieron en isometría. Para hacer el test se utilizó el dinamómetro manual “Mark-10 Series 3 Digital Force Gauge”. Se pidió a las jugadoras que se sentasen en un banco de extensión de cuádriceps donde la cadera quedaba a 90º de flexión y la rodilla a 120º (60º respeto la posición anatómica de extensión). El dinamómetro se fijó al cojín que había en el brazo de la máquina para hacer el isométrico de cuádriceps y se giró para hacer el de isquiosurales (Figura 1). Las jugadoras hicieron tres isométricos progresivos para calentar buscando la fuerza sub-máxima. Después realizaron 3 repeticiones de entre 5-8” buscando la fuerza isométrica máxima de manera progresiva tanto de cuádriceps como de isquiosurales. El punto de contacto en cuádriceps era 5 cm por encima del maléolo peroneal y en los isquiosurales en el talón. Durante la ejecución se controló que las jugadoras no compensasen levantando el culo y/o anteriorizando el tronco. Tanto la pierna de inicio como el grupo muscular que primero se testó, fueron aleatorizados con el programa digital “Oxford Minimization and Randomization” (OxMaR).

“FIGURA 1 AQUÍ”

Con el test de fuerza máxima isométrica se registró la variable de fuerza máxima isométrica (N) y la Ratio I/Q.

Escala de percepción externa de fatiga (RPE)

En e*l Anexo 2* se encuentra la escala de percepción externa de fatiga que se pasó a las jugadoras. Estas, tuvieron que leer y comprender bien la escala y se les pidió un valor antes de empezar la presa de datos y uno 30 minutos después de haber terminado el test fatigante. El valor del RPE se registró del 1-10.

Intervención

La intervención del estudio se hizo mediante el test de fatiga intermitente 30-15, en el cual las jugadoras tuvieron que correr durante un periodo de 30 segundos seguido de 15 segundos de recuperación. El test se empieza con una velocidad de 8 km/h en el primer periodo de 30 segundos y cada serie, es decir cada 45 segundos, se incrementa 0.5 km/h la velocidad. En el test había tres zonas la A y la C, que eran los extremos, de 3m y una zona B, que era la central, de 6m. La distancia entre los dos extremos fue adaptada al baloncesto a 28m y la velocidad de ejecución la marcaba un silbato (*Anexo 3*). Las jugadoras tuvieron que completar el máximo número de etapas posible. La prueba se dio por finalizada cuando no conseguían llegar, por segunda vez, a una de les tres zonas antes que sonase el silbato. Este test se eligió por su similitud con el juego real, ya que tanto el baloncesto como el balonmano son deportes intermitentes donde se dan acciones de intensidad seguidas de períodos cortos de descanso o baja intensidad.25–27

## Análisis estadístico

El análisis de resultados se realizó mediante el paquete estadístico SPSS (Statical Package for the Social Sciences) versión 18.0 para Windows. Las variables cuantitativas obtenidas en el estudio se describieron mediante medidas de tendencia central y dispersión, concretamente, la media y desviación estándar.

En todos los casos se comparó si había normalidad mediante el test de Shapiro-Wilk para muestras de medida n<50.

Para buscar la significación en la Ratio I/Q, en la fuerza muscular y en el RPE pre-post 30-15 IFT se hizo una t-student para muestras dependientes, ya que las tres variables seguían una distribución normal.

Todos los test estadísticos se fijaron con un nivel de significación de α ≤ 0,05.

## Consideraciones éticas

El estudio fue presentado y aceptado por el Comité de Ética de la Recerca de la Facultad de Ciencias de la Salud Blanquerna (CER-FCSB) y cumple los principios de la declaración de Helsinki del 1975 revisada el 1983.

Se presentó una hoja informativa acompañada de un Consentimiento Informado a las jugadoras y a sus pares y/o tutor legal. Los dos tenían que leer éste y firmarlo conforme aceptaban participar voluntariamente en el estudio.

# Resultados

Del total de 30 jugadoras estudiadas, 19 eran jugadoras de baloncesto mientras que 11 eran jugadoras de balonmano. La media () de edad de las deportistas fue de 17.02 ± 1.19 años, en cuanto a datos antropométricos, la media de altura fue de 177.8 ± 7.2 cm y la de peso corporal de 68.6 ± 9.3 kg. En la Tabla 1, puede observarse como quedan estos datos antropométricos según el deporte, la edad y generales.

“TABLA 1 AQUÍ”

Se calculó la Ratio I/Q de la pierna derecha y de la pierna izquierda de las jugadoras antes y después de la prueba fatigante. La media de la Ratio I/Q de la pierna derecha de las jugadoras previa al 30-15 IFT fue de 0.52 ± 0.08 y la post 30-15 IFT de 0.50 ± 0.09. En referencia a la  de la Ratio I/Q de la pierna izquierda previa a la prueba fatigante fue de 0.52 ± 0.13 y la post de 0.50 ± 0.13. Esta diferencia de valores entre la Ratio I/Q no fue significativa estadísticamente ni en la pierna derecha (p ≤ 0.3) ni en la pierna izquierda (p ≤ 0.35) (Tabla 2).

“TABLA 2 AQUÍ”

En la Tabla 3 se pueden observar los valores de fuerza previos y posteriores al test fatigante, obtenidos en la posición descrita anteriormente. En todos los grupos musculares hubo una pérdida de fuerza significativa, en el QD p ≤ 0.05, en el QE p ≤ 0.01, en el ID p < 0.01 y en el IE p < 0.01.

“TABLA 3 AQUÍ”

Por último, en la Tabla 4 se pueden ver los valores del RPE, la media antes de hacer la prueba fatigante fue de 2.43 ± 2 y la de después de 6.10 ± 1.8, dando una p < 0,01.

“TABLA 4 AQUÍ”

# Discusión

En referencia a los objetivos del estudio, en esta muestra, se ha visto que en condiciones de fatiga, la Ratio I/Q no disminuye de manera significativa (p ≤ 0.3 D y p ≤ 0.35 Iz), aun así, sí que se observa que después del test fatigante los valores de fuerza de los cuádriceps y de los isquiosurales, disminuyen de manera significativa y en valores medios, de forma mayor en los isquiosurales (-7.40%, p ≤ 0.01) respecto los cuádriceps (-5.04%, p ≤ 0.01).

El objetivo principal de esta investigación fue estudiar el efecto de la fatiga neuromuscular en la Ratio I/Q en jugadoras de baloncesto y balonmano adolescentes. Los resultados del estudio, demuestran que la disminución de la Ratio I/Q no ha sido significativa estadísticamente ni en la pierna derecha (p ≤ 0.3) ni en la pierna izquierda (p ≤ 0.35). De todos modos, hay una tendencia a que la Ratio I/Q disminuya en presencia de fatiga y aunque no sea significativo estadísticamente, estos resultados pueden ser significativos clínicamente.28

Si comparamos les Ratios I/Q basales con otros estudios, Kabacinski et al. en 2008 hicieron un test de fuerza isocinético con 14 jugadoras de baloncesto de 19.8 ± 1.4 años y registraron Ratios I/Q de 0.48-0.55 a 60º/seg y 180º/seg respectivamente y Rosene et al. en 2001 con una muestra de 10 jugadoras de baloncesto de 19.3 ± 1.32 años, registraron Ratios I/Q de 0.55 (60º/seg). Por otro lado, Pallicer-Chenoll et al. en 2017 hicieron un test de fuerza isocinético a jugadoras de futbol de 22.62 ± 4.69 años donde obtuvieron valores de Ratio I/Q de 0.48, mientras que en el presente estudio las jugadoras presentaron una media de Ratio I/Q de 0.52. Los estudios que han testado la Ratio I/Q en jugadores de género masculino, han obtenido Ratios I/Q en test isocinéticos de entre 0.49 (60º/seg) - 0.8 (240º/seg).28,29 Los estudios, tanto de género femenino como masculino, han establecido que tener una Ratio I/Q inferior a 0.4-0.5 es un factor de riesgo de sufrir lesiones del LCA. Esta relación, en el presente estudio, no se puede establecer ya que no se ha hecho un seguimiento a largo plazo, aún así, las jugadoras muestran un valor en la Ratio > 0.5.

Actualmente la evidencia científica es escasa, de todos modos, ya empieza a haber estudios que analizan el comportamiento de la Ratio I/Q en presencia de fatiga. Los cuatro estudios que observan como se comporta la Ratio I/Q en presencia de fatiga han estado realizados con deportistas de género masculino, tres relacionados con futbol 15,24,29 y uno con jóvenes activos.23 Los autores Pinto et al. 2017 y Rahnama et al. 2003, encontraron diferencias en la Ratio I/Q en presencia de fatiga. El primer grupo de autores hicieron un test de 30 repeticiones máximas de extensión y flexión de rodilla con una máquina isocinética y observaron como la Ratio I/Q disminuía a medida que realizaban las repeticiones. Por su parte, Rahnama et al., registraron la Ratio I/Q previa y posterior a un test fatigante (“Loughbrough Intermittent Shuttle Test”) y también observaron Ratios I/Q más bajas en fatiga. Delextrat et al. 2010 hicieron un estudio parecido al anterior donde encontraron que después de un test fatigante la Ratio I/Q disminuía, pero no significativamente. Por otro lado, Behan et al. 2018 analizaron la Ratio I/Q explosiva con un test isocinético y no encontraron diferencias en presencia de fatiga.

En el presente estudio después del test fatigante la Ratio I/Q no disminuye de manera significativa, pero muestra una tendencia a disminuir. Esto podría ser debido a que los flexores de rodilla se fatigan más que los extensores y al tener mayor pérdida de fuerza los isquiosurales, el valor de Ratio I/Q disminuye aumentando la diferencia entre ambos grupos musculars.23

En referencia al objetivo secundario, que fue investigar cómo afecta la fatiga neuromuscular en la fuerza máxima isométrica de cuádriceps e isquiosurales, en este estudio se ha podido observar que la fuerza muscular de cuádriceps e isquiosurales disminuye en presencia de fatiga de manera significativa (p ≤ 0.01). Asimismo, algunos autores ya han registrado pérdidas de fuerza del cuádriceps y los isquiosurales en presencia de fatiga.15,24,29 En concreto, Behan et al. 2018 hicieron un estudio donde realizaban un test fatigante (“Loughbrough Intermittent Shuttle Test”) y detectaron una pérdida de fuerza de los cuádriceps del 12% y una pérdida de fuerza de los Isquiosurales del 15%, siendo mayor la pérdida de fuerza de los flexores de rodilla. Estos resultados se parecen a los del presente estudio donde se ha registrado una pérdida de fuerza del 5% en los cuádriceps y del 7.4% en los isquiosurales. La pérdida de fuerza en la investigación del grupo de Behan et al. fue mayor que la del presente estudio, esto puede atribuirse al nivel de entrenamiento, ya que la muestra del autor fueron sujetos activos y la del presente estudio jugadoras de alto rendimiento. De todos modos, ambos estudios registraron una pérdida de fuerza mayor en los flexores de rodilla respecto los extensores.

En cuanto a la detección de la fatiga neuromuscular, varios estudios han elegido la escala de percepción externa de fatiga (RPE) para detectarla.30–32 El RPE presenta una correlación elevada con la presencia de biomarcadores de fatiga en sangre como el lactato y el amoníaco.30 Al ser significativa la diferencia del valor obtenido en la escala antes y después de la prueba fatigante (p ≤ 0.01), se concluye que las jugadoras después de realizar el 30-15 IFT, estaban fatigadas.

Respecto a las limitaciones del presente estudio, hay que tener en cuenta que no todas las jugadoras hicieron el test de fuerza máxima isométrica a la vez y que tuvieron diferentes tiempos de recuperación después del test fatigante.

En futuros estudios, sería interesante comparar estos resultados con el género masculino y observar si después de un partido la pérdida de fuerza y la variación en la Ratio I/Q se asimilen a los obtenidos en el presente estudio.

Con el presente estudio se concluye que, en esta muestra, después del test fatigante la fuerza muscular máxima isométrica de los isquiosurales y de los cuádriceps disminuyen, los isquiosurales se fatigan ligeramente más que los cuádriceps y consecuentemente, hay una tendencia a que la Ratio I/Q también disminuya una vez realizada el test fatigante.

# Agradecimientos

Nos gustaría expresar nuestro agradecimiento al equipo “Segle XXI” y al grupo de Tecnificación de balonmano por dejarnos hacer el estudio y al Centro Médico de la Residencia Joaquim Blume.

# Referencias

1. Petersen W, Braun C, Bock W, Schmidt K, Weimann A, Drescher W, et al. A controlled prospective case control study of a prevention training program in female team handball players: the German experience. Arch Orthop Trauma Surg. 2005;125(9):614–21.

2. Zuckerman S, Wegner A, Roos K, Djoko A, Dompier T, Kerr Z. Injuries sustained in National Collegiate Athletic Association men’s and women’s basketball, 2009/2010–2014/2015. Br J Sport Med. 2018;52(4):216–68.

3. Taylor JB, Ford KR, Nguyen AD, Terry LN, Hegedus EJ. Prevention of Lower Extremity Injuries in Basketball: A Systematic Review and Meta-Analysis. Sports Health. 2015;7(5):392–8.

4. Barber F, Kim D, Myer D, Hewett T. Epidemiology of Basketball, Soccer, and Volleyball Injuries in Middle-School Female Athletes. Phys Sport. 2014;42(2):146–53.

5. Busfield BT, Kharrazi FD, Starkey C, Lombardo SJ, Seegmiller J. Performance Outcomes of Anterior Cruciate Ligament Reconstruction in the National Basketball Association. Arthrosc - J Arthrosc Relat Surg. 2009;25(8):825–30.

6. Wedderkopp N, Kaltoft M, Lundgaard B, Rosendahl M FK, Wedderkopp N, Kaltoft M, Lundgaard B, Rosendahl M, Froberg K. Injuries in young female players in European team handball. Scand J Med Sci Sport. 1997;7(6):342–7.

7. Hewett T, Myer G, Ford K, Paterno M, Quatman C. Mechanisms, Prediction, and Prevention of ACL Injuries: Cut Risk With Three Sharpened and Validated Tools. J Orthop Res. 2016;34(11):1843–55.

8. Myklebust G, Maehlum S, Engebretsen L, Strand T, Solheim E. Registration of cruciate ligament injuries in Norwegian top level team handball. A prospective study covering two seasons. Scand J Med Sci Sport Sci Sport. 1997;7(5):289–92.

9. Myer GD, Ford KR, Brent JL, Hewett TE. Differential neuromuscular training effects onACL injury risk factors in"high-risk" versus “low-risk” athletes. BMC Musculoskelet Disord. 2007;8(8):39.

10. Fort-Vanmeerhaeghe A, Romero-Rodriguez D, Lloyd RS, Kushner A, Myer GD. Integrative neuromuscular training in youth athletes. Part I: Identifying risk factors. Strength Condit J. 2016;38(3):36–48.

11. Alentorn-Geli E, Mendiguchía J, Samuelsson K, Musahl V, Karlsson J, Cugat R, et al. Prevention of anterior cruciate ligament injuries in sports-Part I: Systematic review of risk factors in male athletes. Knee Surg Sport Traumatol Arthrosc. 2014;22(1):3–15.

12. Griffin LY, Albohm MJ, Arendt EA, Bahr R, Beynnon BD, DeMaio M, et al. Understanding and preventing noncontact anterior cruciate ligament injuries: A review of the Hunt Valley II Meeting, January 2005. Am J Sport Med. 2006;34(9):1512–32.

13. Thompson BJ, Cazier CS, Bressel E, Dolny DG. A lower extremity strength-based profile of NCAA Division I women’s basketball and gymnastics athletes: implications for knee joint injury risk assessment. J Sport Sci. 2018;36(15):1749–56.

14. Borotikar BS, Newcomer R, Koppes R, McLean SG. Combined effects of fatigue and decision making on female lower limb landing postures: Central and peripheral contributions to ACL injury risk. Clin Biomech. 2008;23(1):81–92.

15. Rahnama N, Reilly T, Lees A, Graham-Smith P. Muscle fatigue induced by exercise simulating the work rate of competitive soccer. J Sport Sci. 2003;21(11):933–42.

16. Hewett TE, Ford KR, Hoogenboom BJ. Understanding and Preventing Acl Injuries: Current Biomechanical and Epidemiologic Considerations - Update 2010. N Am J Sport Phys Ther. 2010;5(4):234–51.

17. Rosene JM, Fogarty TD, Mahaffey BL. Isokinetic Hamstrings:Quadriceps Ratios in Intercollegiate Athletes. J Athl Train. 2001;36(4):378–83.

18. Kabacinski J, Murawa M, Mackala K, Dworak LB. Knee strength ratios in competitive female athletes. PLoS One. 2018;13(1):1–12.

19. Whiteley R, Jacobsen P, Prior S, Skazalski C, Otten R, Johnson A. Correlation of isokinetic and novel hand-held dynamometry measures of knee flexion and extension strength testing. J Sci Med Sport. 2012;15(5):444–50.

20. Peek K, Gatherer D, Bennett KJM, Fransen J, Watsford M. Muscle strength characteristics of the hamstrings and quadriceps in players from a high-level youth football (soccer) Academy. Res Sport Med. 2018;26(3):276–88.

21. Ahmad CS, Clark AM, Heilmann N, Schoeb JS, Gardner TR, Levine WN. Effect of gender and maturity on quadriceps-to-hamstring strength ratio and anterior cruciate ligament laxity. Am J Sport Med. 2006;34(3):370–4.

22. Ekstrand J, Hägglund M, Waldén M. Injury incidence and injury patterns in professional football : the UEFA injury study. Br J Sport Med. 2011;45(7):553–8.

23. Behan FP, Willis S, Pain MTG, Folland JP. Effects of football simulated fatigue on neuromuscular function and whole-body response to disturbances in balance. Scand J Med Sci Sport. 2018;28(12):2547–57.

24. Pinto M, Blazevich A, Andersen L, Mil-Homens P, Pinto R. Hamstring-to-quadriceps fatigue ratio offers new and different muscle function information than the conventional non-fatigued ratio. Scand J Med Sci Sport. 2017;28(1):282–93.

25. Buchheit M. The 30-15 Intermittent Fitness Test: 10 year review. Myorobie J. 2010;1:1–9.

26. Haydar B, Buchheit M. Le 30-15 Intermittent Fitness Test- application pour le Basketball. Pivot. 2009;2–5.

27. Buchheit M. The 30-15 Intermittent Fitness Test: Accuracy For Individualizing Interval Training of Young Intermittent Sport Players. J Strength Cond Res. 2008;22(2):365–74.

28. Pallicer-Chenoll M, Serra-Añó P, Cabeza-Ruiz R, Pardo A, Aranda R, González L. Comparison of conventional hamstring/quadriceps ratio between genders in level-matched soccer players. Rev Andl Med Deport. 2017;10(1):14–8.

29. Delextrat A, Gregory J, Cohen D. The use of the functional H:Q ratio to assess fatigue in soccer. Int J Sport Med. 2010;31(3):192–7.

30. Impellizzeri FM, Rampinini E, Coutts AJ, Marcora SM. Use of RPE-based training load in soccer. Med Sci Sport Exerc. 2004;36(6):1042–7.

31. Clemente FM, Mendes B, Palao JM, Silvério A, Carriço S, Calvete F, et al. Seasonal player wellness and its longitudinal association with internal training load: study in elite volleyball. J Sport Med Phys Fit [Internet]. 2019;59(3):345–51.

32. Freitas VH, Nakamura FY, Miloski B, Samulski D, Mauricio G. Sensitivity of Physiological and Psychological Markers to Training Load Intensi- fication in Volleyball Players. J Sport Sci Med. 2014;13(3):571–9.

# Tablas

| Tabla 1. Características de los participantes (n: 30) | | | | | | |
| --- | --- | --- | --- | --- | --- | --- |
|  | Baloncesto | | | Balonmano | | Total (n = 30) |
|  | Cadete (n = 9) | Juvenil (n = 10) | | Cadete (n = 4) | Juvenil (n = 7) |
| Edad (años) | 15.93 ± 0.61 | | 18.04 ± 0.60 | 15.71 ± 0.66 | 17.72 ± 0.57 | 17.02 ± 1.19 |
| Talla (cm) | 177.9 ± 7.3 | | 181.5 ± 7.5 | 175.2 ± 5.8 | 173.9 ± 5.5 | 177.8 ± 7.2 |
| Peso  (kg) | 71.3 ± 10.1 | | 71.4 ± 10.9 | 63.9 ± 7.6 | 64.0 ± 3.8 | 68.6 ± 9.3 |

| Tabla 2. Ratio de la pierna derecha e izquierda antes y después del 30-15IFT | | |
| --- | --- | --- |
|  | Ratio D (n = 30) | Ratio Iz (n = 30) |
| Previa 30-15 IFT | 0.523 ± 0.8 | 0.512 ± 0.13 |
| Posterior 30-15 IFT | 0.506 ± 0.9 | 0.508 ± 0.13 |
| p-valor | ≤ 0.30 | ≤ 0.35 |
| D = derecha; Iz = izquierda | | |

| Tabla 3. Fuerza muscular de cuádriceps y de isquiosurales previa y posterior al 30-15 IFT | | | | |
| --- | --- | --- | --- | --- |
|  | F QD (n = 30) | F QIz (n = 30) | F ID (n = 30) | F IIz (n = 30) |
| Previa 30-15 IFT | 531N ± 83 | 505N ± 127 | 274N ± 41 | 267N ± 60 |
| Posterior 30-15 IFT | 507N ± 91 | 477N ± 121 | 254N ± 49 | 247N ± 62 |
| p-valor | ≤ 0.05 | ≤ 0.01 | < 0.01 | < 0.01 |
| F = fuerza; QD = cuádriceps derecho; QIz = cuádriceps izquierdo; ID = isquiosurales derecho; IIz = isquiosurales izquierdo | | | | |

| Tabla 4. Valores del RPE pre y post 30-15 IFT | | |
| --- | --- | --- |
|  | RPE (n=30) | p-valor |
| Previa 30-15 IFT | 2 ± 2 | < 0.01 |
| Posterior 30-15 IFT | 6 ± 2 |
| RPE = escala de percepción externa de fatiga | | |

# Figuras

| Figura 1: **Test de fuerza máxima isométrica**: Test de fuerza máxima isométrica de cuádriceps (1a) y test de fuerza máxima isométrica de isquiosurales (1b). |
| --- |

# Anexos

## Anexo 1: Calentamiento realizado antes de la presa de datos a las deportistas.

El calentamiento dura de 8-10 minutos, se hizo entre dos líneas a 15m. Cada ejercicio se hace de línea a línea.

- Caminando movimientos de brazos marcando bien la pisada: ida hacia delante, vuelta hacia atrás, ida cruzado, vuelta contrario a delante y atrás.
- Trote hacia delante y vuelta de espaldas. X2
- Ida “*Skipping*” y vuelta talones al culo. X2
- Desplazamiento lateral. X2
- Desplazamiento lateral cruzando (“carioca”). x2
- Lanzamiento de pierna avanzando.
- Ángel o “deadlift” avanzando.
- Piramidal avanzando.
- Cambios de dirección. X2
- Lunge avanzando con los brazos arriba, ida y vuelta.
- Squat en el sitio. X5
- Squat lateral en el sitio. X5 cada lado
- Tensión activa de Isquiosurales.
- Tensión activa tríceps surales.
- Tijeras cortas x 6”
- Tijeras largas x 6”
- Salto vertical:
  - 2 piernas a 2 piernas x2
  - 2 piernas a 1 piernas (dos por pierna)
  - 1 pierna a 1 pierna (dos per pierna)
- Skipping en el sitio y progresivo al estímulo acústico
- Skipping en el sitio y sprint al estímulo acústico.
- 3 series de carrera de zona A a zona B
  - 1a: ida y vuelta 3 veces al 70%
  - 2a: ida y vuelta 3 veces al 80%
  - 3a: ida y vuelta 3 veces al 95%

Anexo 2: Tabla de la escala de percepción externa de fatiga (RPE) 30

| Tabla 5 |
| --- |
| Escala de percepción externa de fatiga |
| | Escala RPE | | | --- | --- | | 1 | Nada | | 2 | Esfuerzo muy suave | | 3 | Suave | | 4 | Cómodo | | 5 | Un poco duro | | 6 | Duro | | 7 | Bastante Duro | | 8 | Muy duro | | 9 | Extremadamente duro | | 10 | Esfuerzo máximo | |

Anexo 3: Test de fatiga intermitente 30-15 26

A continuación, en la Figura 2, encontramos el test de fatiga intermitente 30-15 adaptado al baloncesto con una separación entre líneas de 28m.

Figura 2

Test de fatiga intermitente 30-15 para baloncesto

“FIGURA 2 AQUÍ”
